# Supplementary material for: Defining cardiac adaptations and safety of endurance training in patients with m.3243A>G-related mitochondrial disease
Source: PubMed Central journal article supplement — Int J Cardiol. 2013 Oct 9;168(4):3599–608. doi: 10.1016/j.ijcard.2013.05.062 (PMC3819621; doi:10.1016/j.ijcard.2013.05.062), 2013-10-09
Supplement: mmc1.pdf [file mmc1.pdf]

**Supplementary table 1. Frequency of clinical features**

| Clinical feature           | Number of patients<br>(n=10) |
|----------------------------|------------------------------|
| Exercise intolerance       | 10                           |
| Sensorineural hearing loss | 9                            |
| Ataxia                     | 8                            |
| Constipation               | 5                            |
| Diabetes mellitus          | 5                            |
| Fatigue                    | 5                            |
| Migraine                   | 5                            |
| Muscle weakness            | 5                            |
| Depression                 | 4                            |
| Epilepsy                   | 2                            |
| Myalgia                    | 2                            |
| Ophthalmoparesis           | 2                            |
| Ptosis                     | 2                            |
| Retinopathy                | 2                            |
| Underweight (BMI <18.5)    | 2                            |
| Cognitive decline          | 1                            |
| Dysarthria                 | 1                            |
| Dysphagia                  | 1                            |
| Encephalopathy             | 1                            |
| Hypertension               | 1                            |
| Hypothyroidism             | 1                            |
| Neuropathy                 | 1                            |
| Short stature              | 1                            |

BMI = body mass index

**Supplementary table 2. Body composition and blood analyses before and after training**

| Parameter                 | Patients    |             |                                | Controls      |               |                                | Interaction<br><i>p</i> value <sup>b</sup> |
|---------------------------|-------------|-------------|--------------------------------|---------------|---------------|--------------------------------|--------------------------------------------|
|                           | Baseline    | Follow up   | <i>p</i><br>value <sup>a</sup> | Baseline      | Follow up     | <i>p</i><br>value <sup>a</sup> |                                            |
| Body composition          |             |             |                                |               |               |                                |                                            |
| Weight (kg)               | 62.1 ± 12.2 | 62.8 ± 11.8 | 0.150                          | 81.9 ± 12.9** | 81.6 ± 12.8** | 0.777                          | 0.909                                      |
| BMI                       | 21.3 ± 3.4  | 21.5 ± 3.3  | 0.154                          | 27.7 ± 4.7**  | 27.6 ± 4.4**  | 0.670                          | 0.907                                      |
| Lean body weight<br>(kg)  | 46.6 ± 12.7 | 47.6 ± 12.4 | 0.056                          | 55.7 ± 9.2    | 55.8 ± 8.8    | 0.728                          | 0.944                                      |
| Fat (% of body<br>weight) | 25.7 ± 8.9  | 25.1 ± 7.6  | 0.509                          | 31.7 ± 11.1   | 31.0 ± 10.0   | 0.421                          | 0.993                                      |
| Blood analyses            |             |             |                                |               |               |                                |                                            |
| Lactate                   | 2.1 ± 0.5   | 2.6 ± 0.9   | 0.132                          | 2.3 ± 1.0     | 1.9 ± 0.8     | 0.648                          | 0.202                                      |
| Creatine kinase           | 121 ± 46    | 143 ± 77    | 0.404                          | 125 ± 49      | 124 ± 55      | 0.958                          | 0.833                                      |

BMI = body mass index; <sup>a</sup> *p* value represents the within group comparison of paired before and follow up time points; <sup>b</sup> *p* value represents group by time interaction from mixed model repeated measures analysis; \* *p*<0.05 and \*\* *p*<0.01 for patients vs controls at equivalent time points

**Supplementary table 3. Disease burden and quality of life before and after exercise training**

| <b>Score</b> | <b>Baseline</b> | <b>Follow-up</b> | <b><i>p</i> value</b> |
|--------------|-----------------|------------------|-----------------------|
| NMDAS        | 16 ± 7          | 15 ± 7           | 0.269                 |
| SF-12 MHC    | 50 ± 9          | 48 ± 14          | 0.673                 |
| SF-12 PHC    | 45 ± 12         | 44 ± 12          | 0.434                 |

NMDAS = Newcastle Mitochondrial Disease Adult Scale; FIS = Fatigue Impact Scale; SF-12 = Short Form 12 Health Questionnaire; MHC = mental health component; PHC = physical health component.
